# Supplementary material for: Improved method of structure-based virtual screening based on ensemble learning
Source: Royal Society of Chemistry journal article supplement (doi:10.1039/c9ra09211k), 2020-01-01
Supplement: c9ra09211k1.pdf [file c9ra09211k1.pdf]

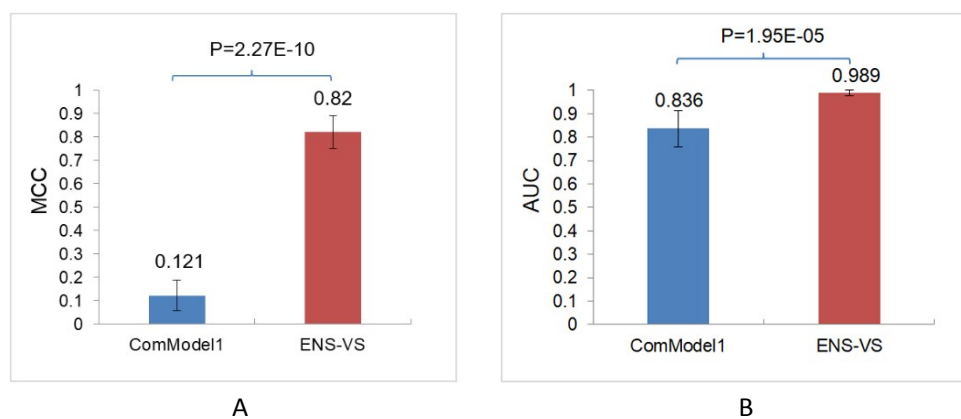

Fig. S1 The mean MCC, AUC and P-value of ComModel1 and ENS-VS for 12 targets.

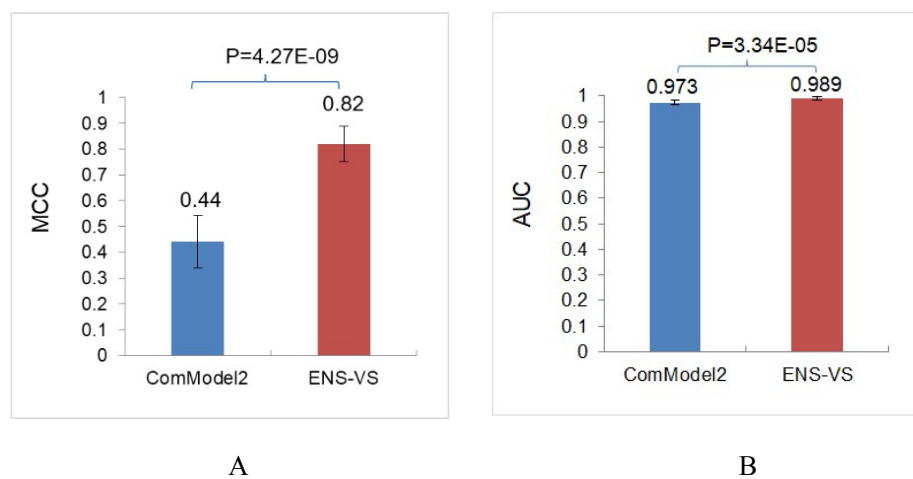

Fig. S2 The mean MCC, AUC and P-value of ComModel2 and ENS-VS for 12 targets.

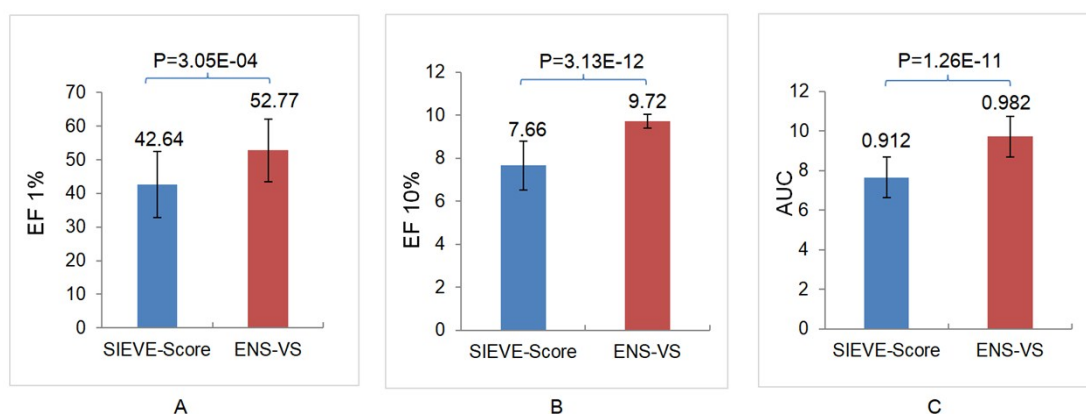

Fig. S3 The mean EF 1%, EF 10%, AUC and P-value of ENS-VS and SIEVE-Score for 37 targets.
